# Supplementary material for: In situ construction of an SnO2/g-C3N4 heterojunction for enhanced visible-light photocatalytic activity
Source: Royal Society of Chemistry journal article supplement (doi:10.1039/c5ra11801h), 2015-01-01
Supplement: c5ra11801h1.pdf [file c5ra11801h1.pdf]

Supplementary data

In Situ Construction of SnO<sub>2</sub>/g-C<sub>3</sub>N<sub>4</sub> heterojunction for  
Enhanced Visible-Light Photocatalytic Activity

*Xi Chen<sup>a</sup>, Banhong Zhou<sup>a</sup>, Shuanglei Yang<sup>a</sup>, Hanshuo Wu<sup>a</sup>, Yuxing Wu<sup>a</sup>, Laidi Wu<sup>a</sup>, Jun  
Pan<sup>a,\*</sup>, Xiang Xiong<sup>a,\*</sup>*

<sup>a</sup>State Key Laboratory for Powder Metallurgy, Central South University, Changsha  
410083, P. R. China

\*To whom correspondence should be addressed: [xiongx@csu.edu.cn](mailto:xiongx@csu.edu.cn) or  
[jun.pan@csu.edu.cn](mailto:jun.pan@csu.edu.cn)

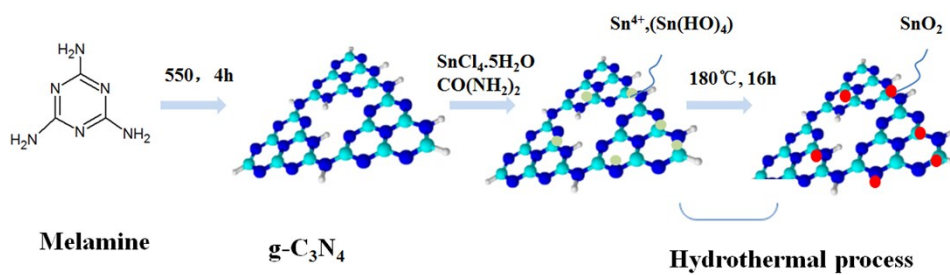

**Figure S1.** Schematic representation of the in situ deposition of SnO<sub>2</sub> nanoparticles on the layered g-C<sub>3</sub>N<sub>4</sub> sheet.

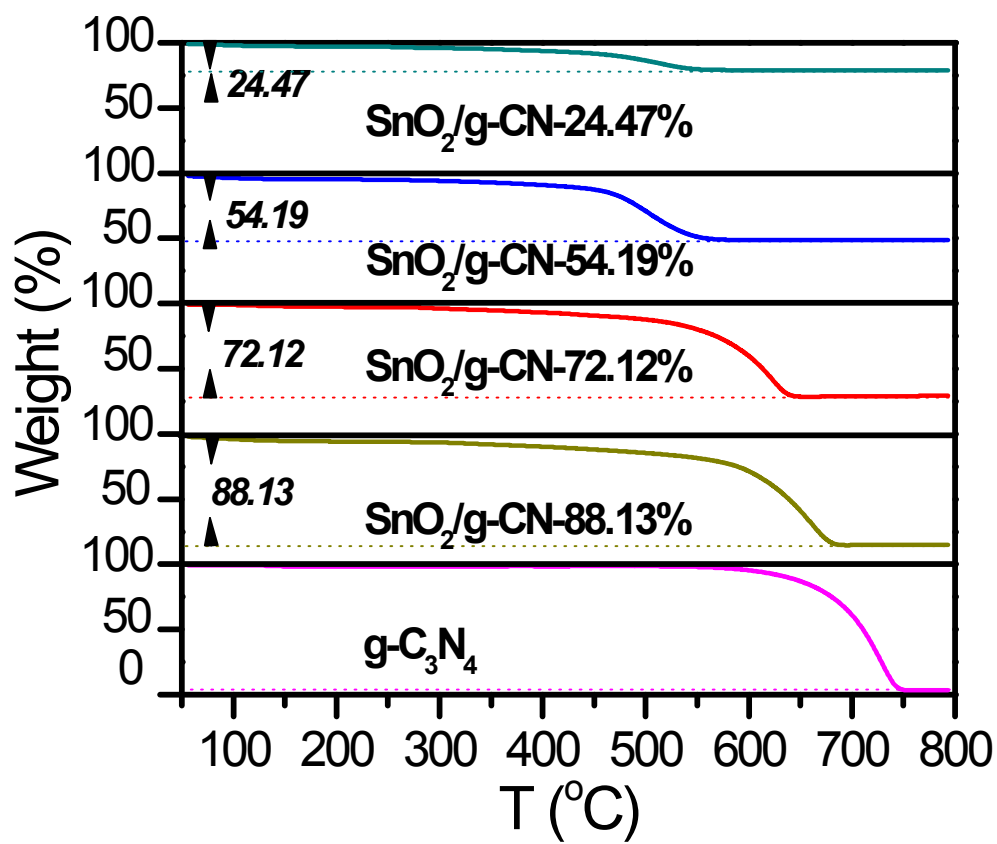

**Figure S1.** TG analyses for pure g-C<sub>3</sub>N<sub>4</sub>, SnO<sub>2</sub>/g-CN-88.13%, SnO<sub>2</sub>/g-CN-72.12%, SnO<sub>2</sub>/g-CN-54.19%, and SnO<sub>2</sub>/g-CN-24.47%.

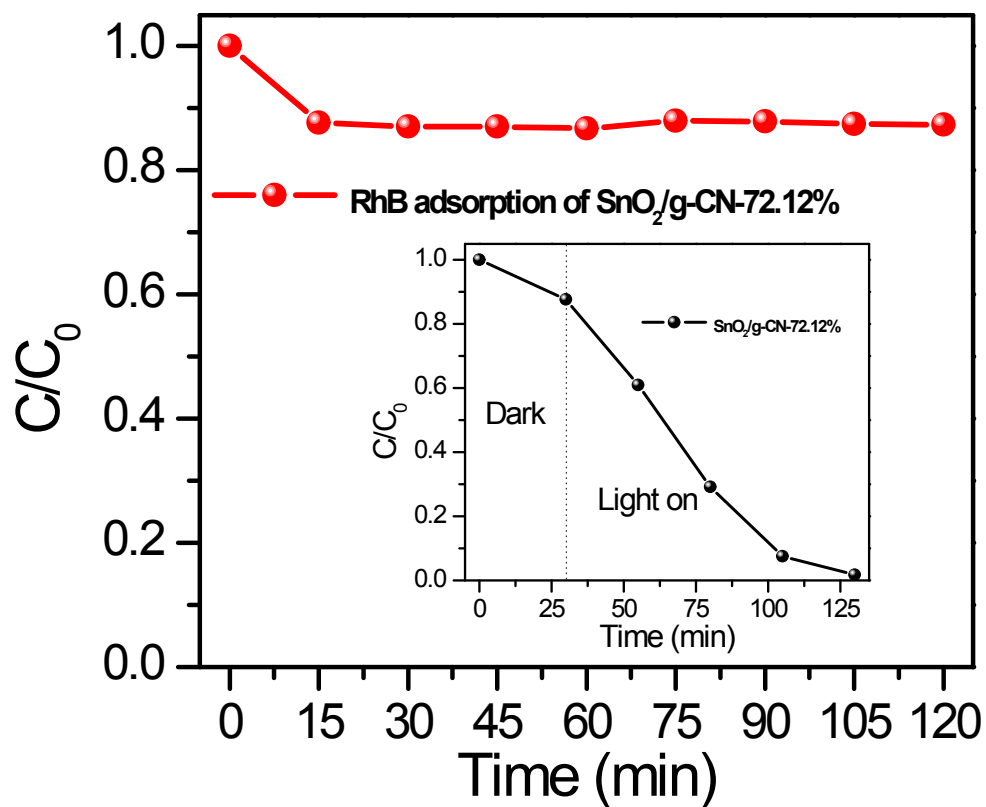

**Figure S2.** RhB adsorption of  $\text{SnO}_2/\text{g-CN-72.12\%}$  photocatalysts in the dark. Inset shows RhB adsorption and degradation in the dark and light irradiation, respectively.

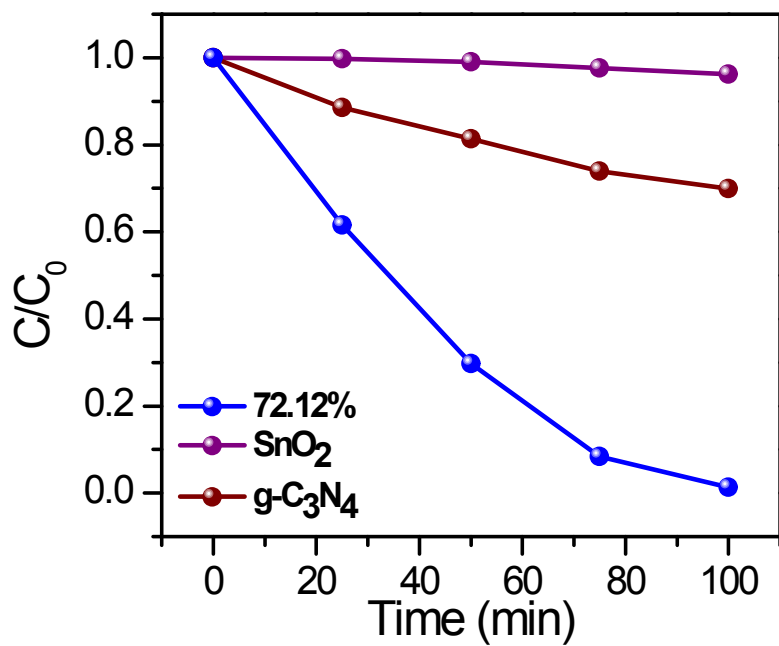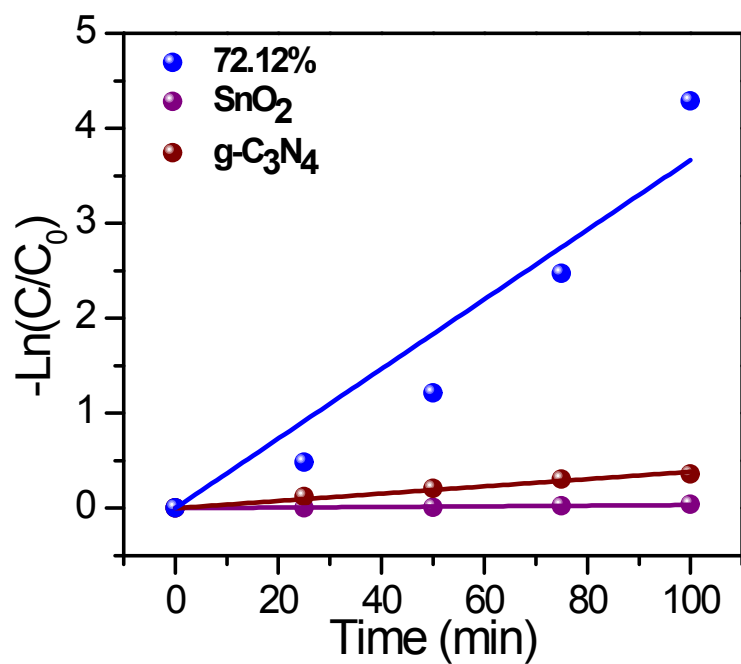

**Figure S3.** (a) Degradation rate of RhB under visible-light irradiation (>420 nm) with the presence of pure g-C<sub>3</sub>N<sub>4</sub>, SnO<sub>2</sub> and SnO<sub>2</sub>/g-CN-72.12% nanocomposites.(b) a natural logarithm C<sub>0</sub>/C fitting curves of all samples.
